# Supplementary material
Source: HighWire-hosted journal article supplement (http://dmd.aspetjournals.org/highwire/filestream/79266/field_highwire_adjunct_files/3/453_supp_figures.pdf)
Supplement: 453_supp_figures.pdf [file 453_supp_figures.pdf]

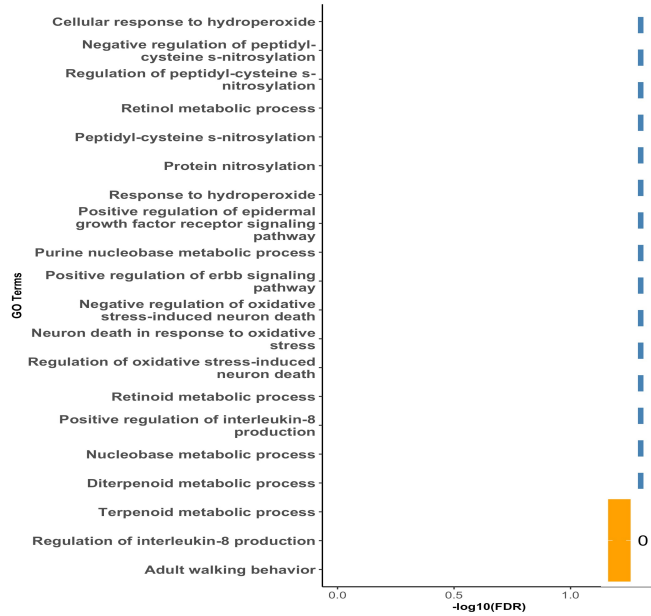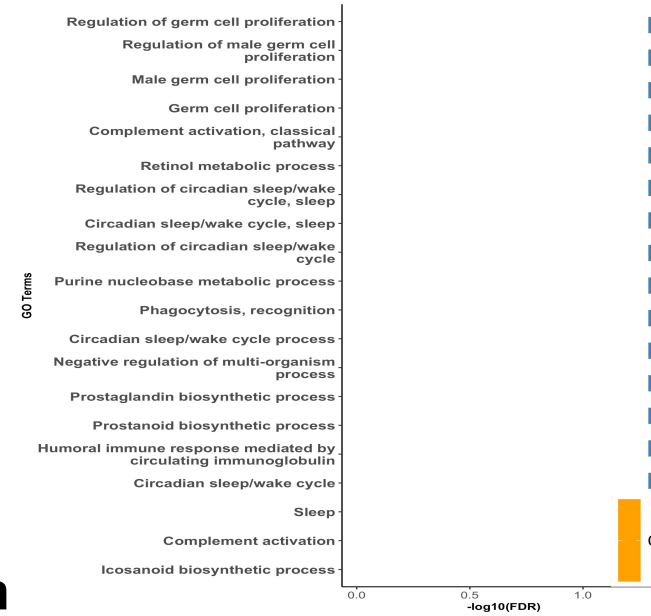

**Brain**

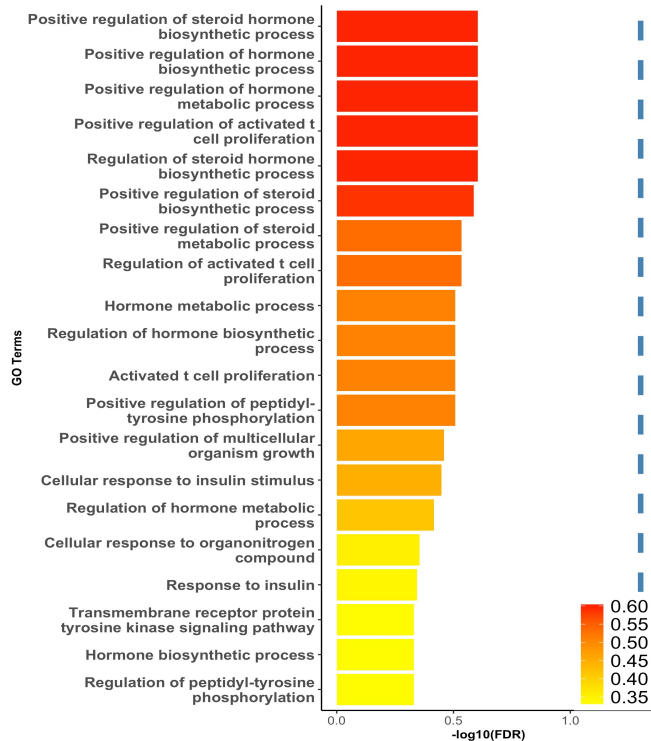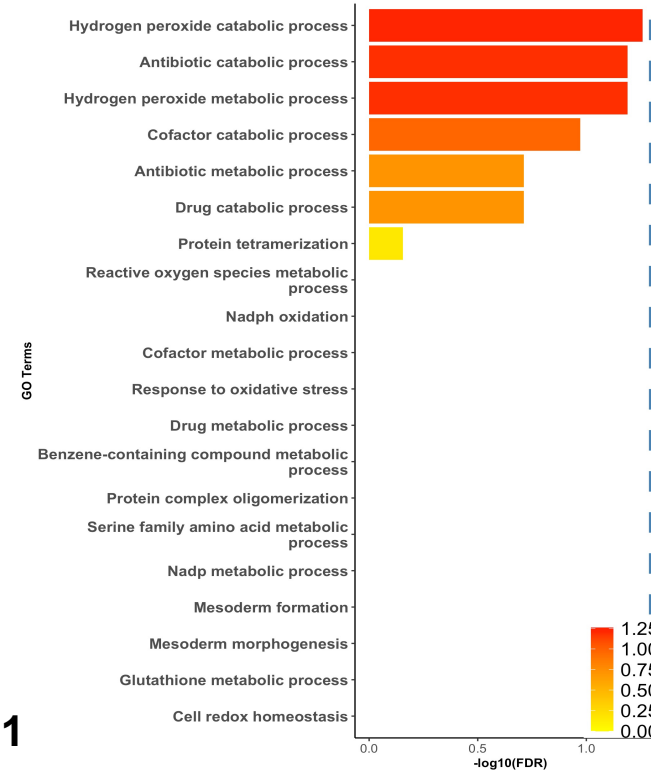

**Fig.s1**

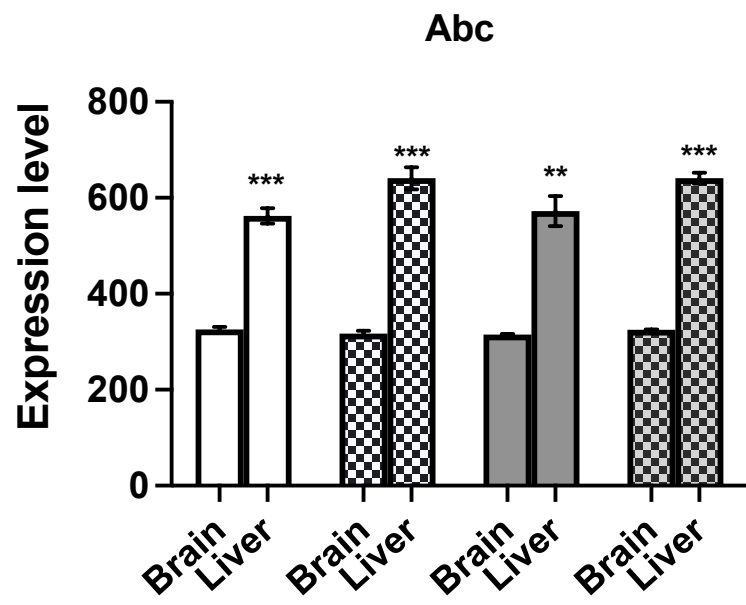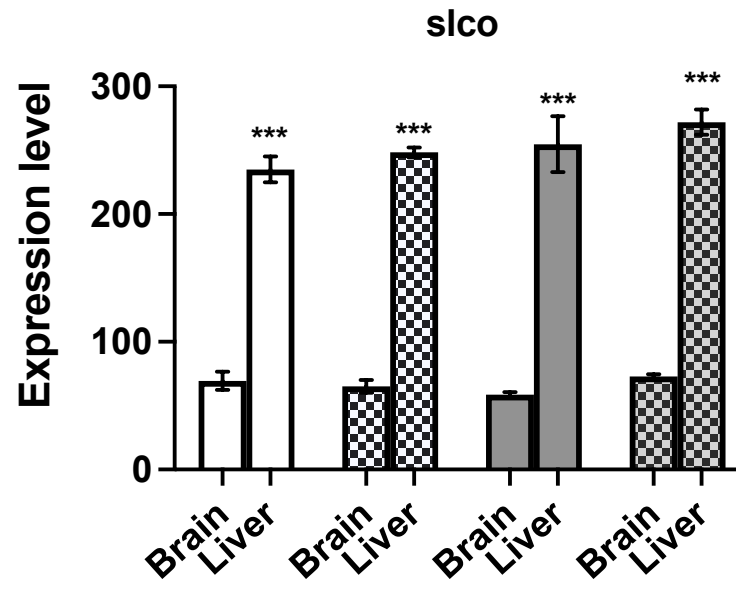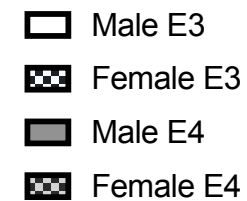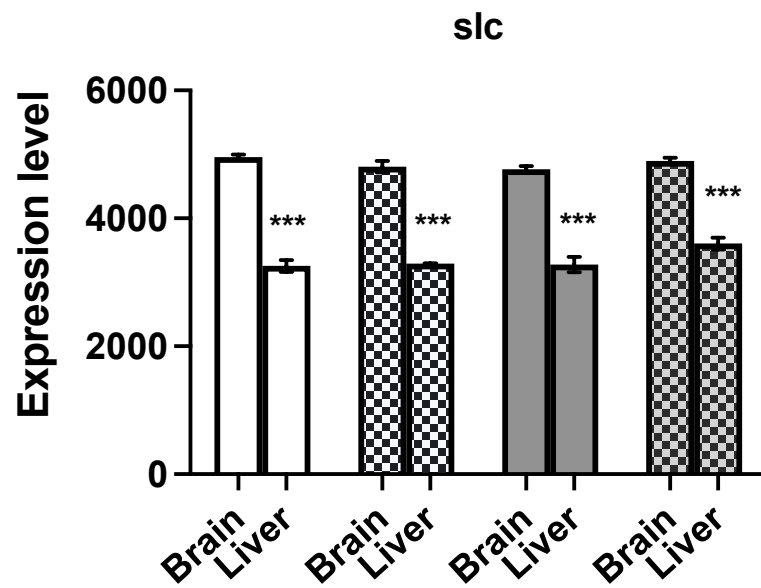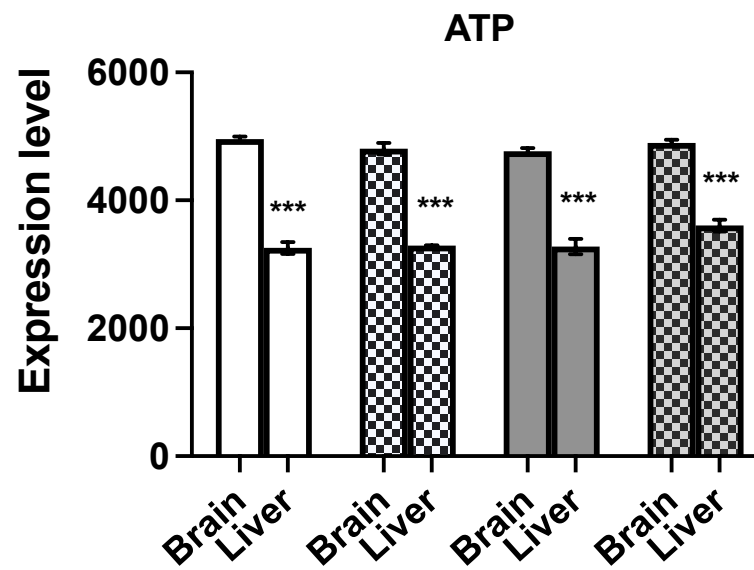

Fig.s2

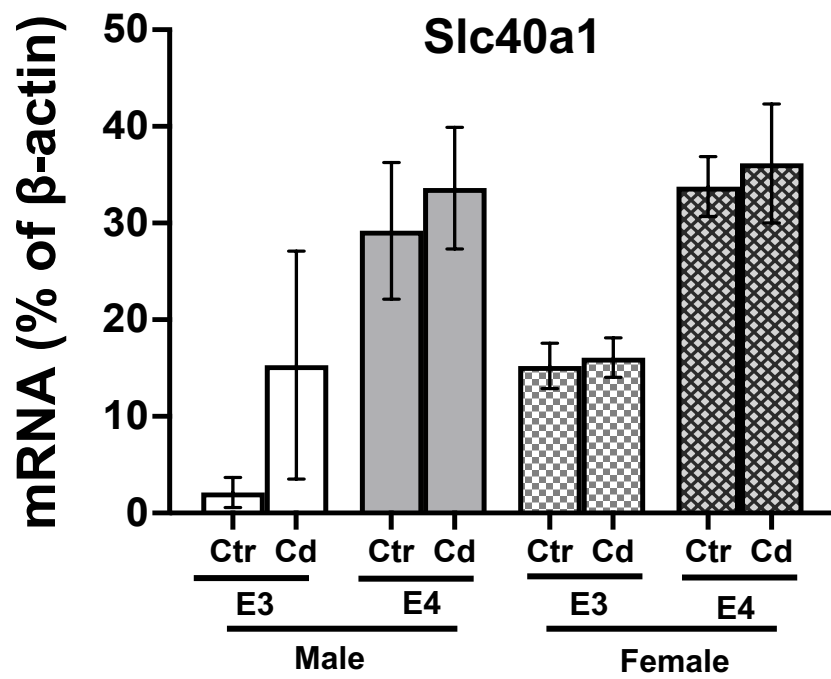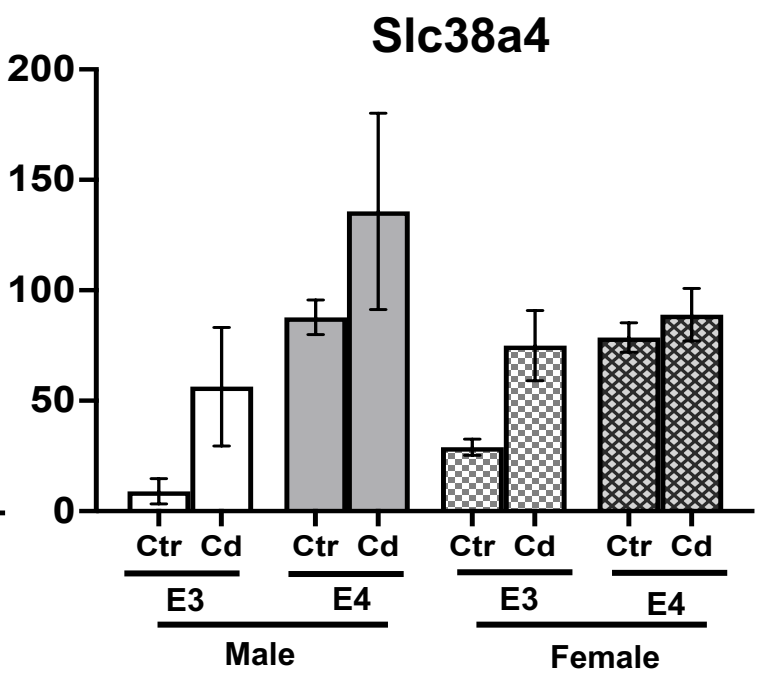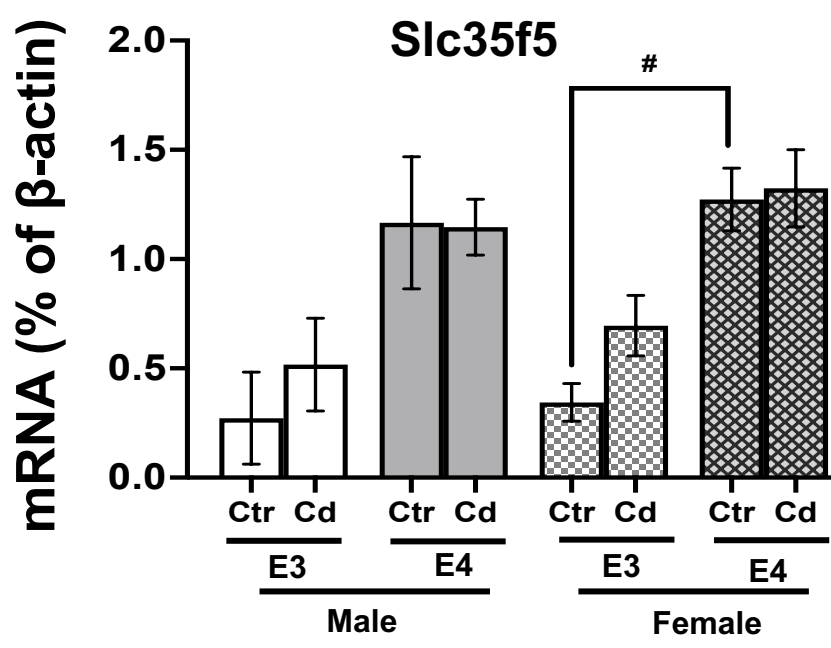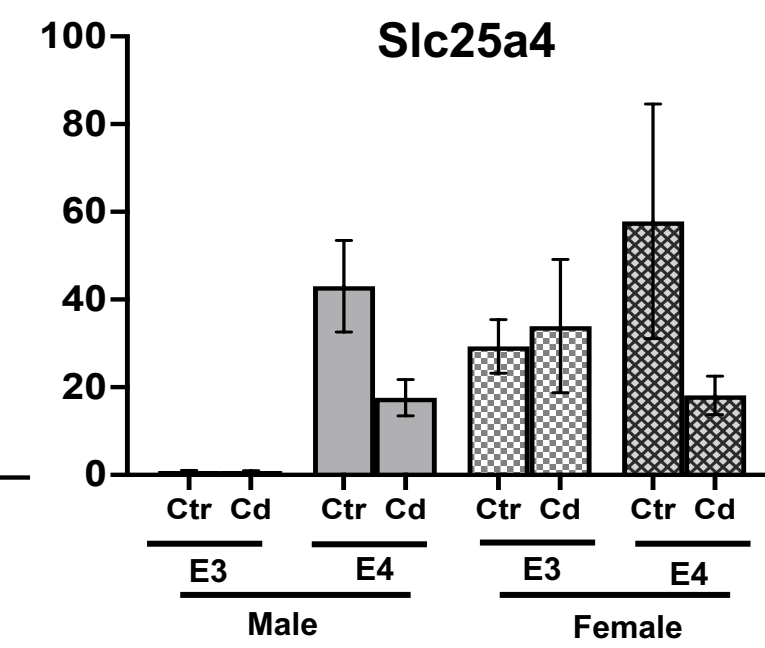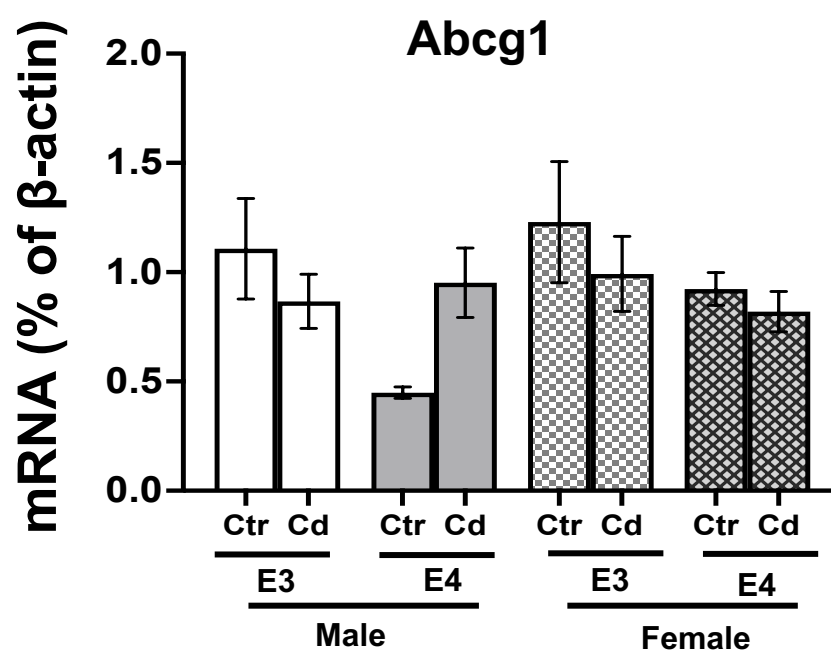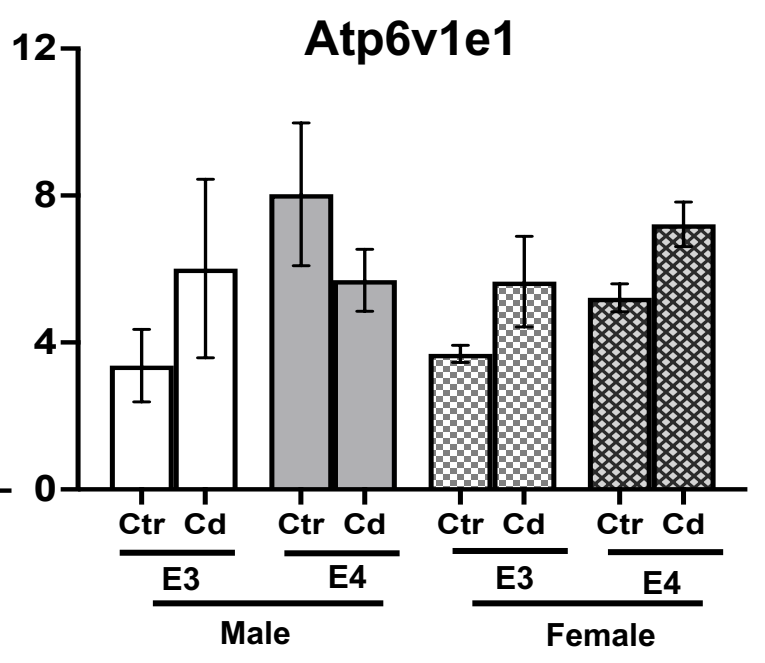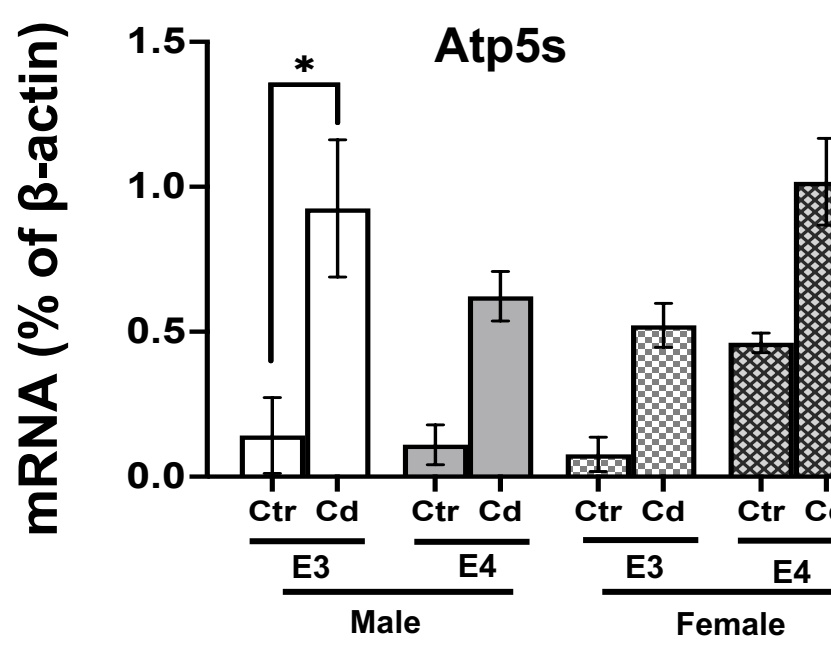

Fig.s3

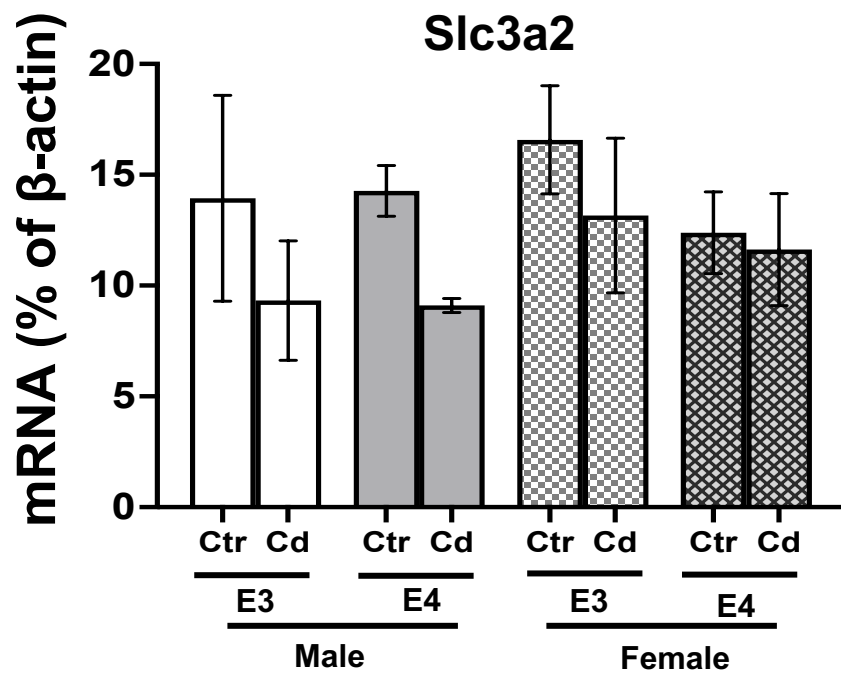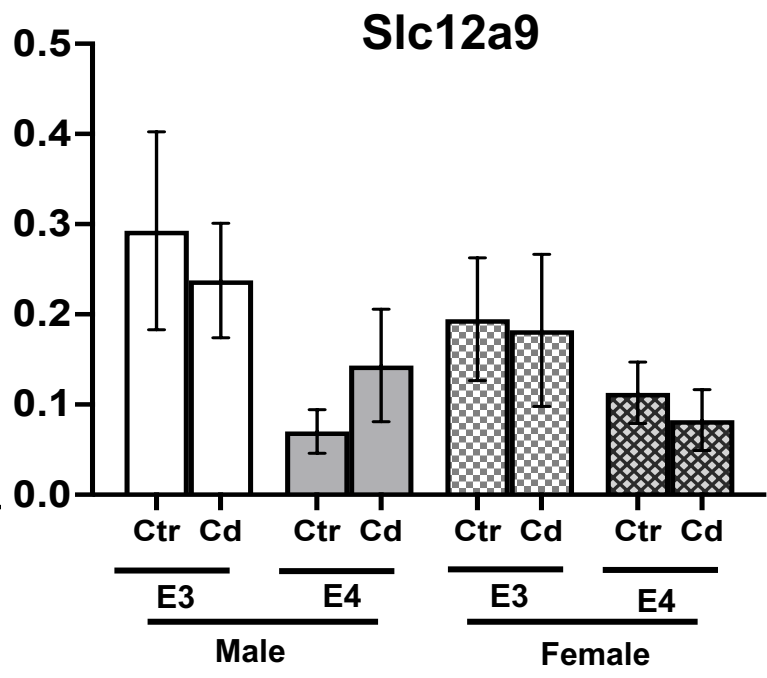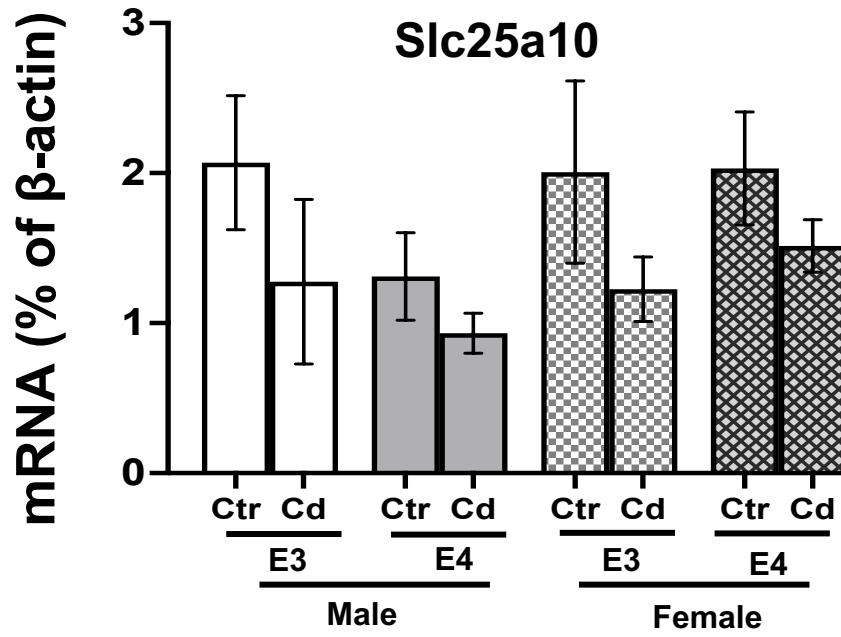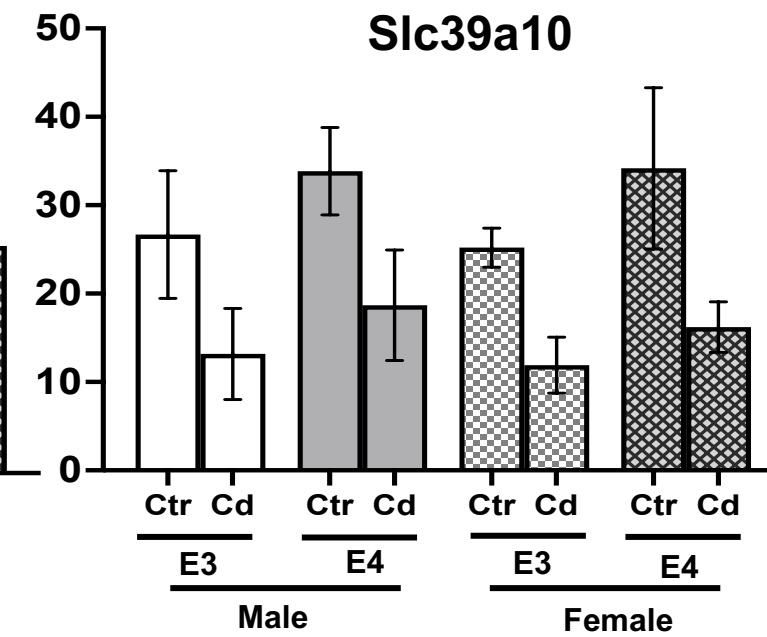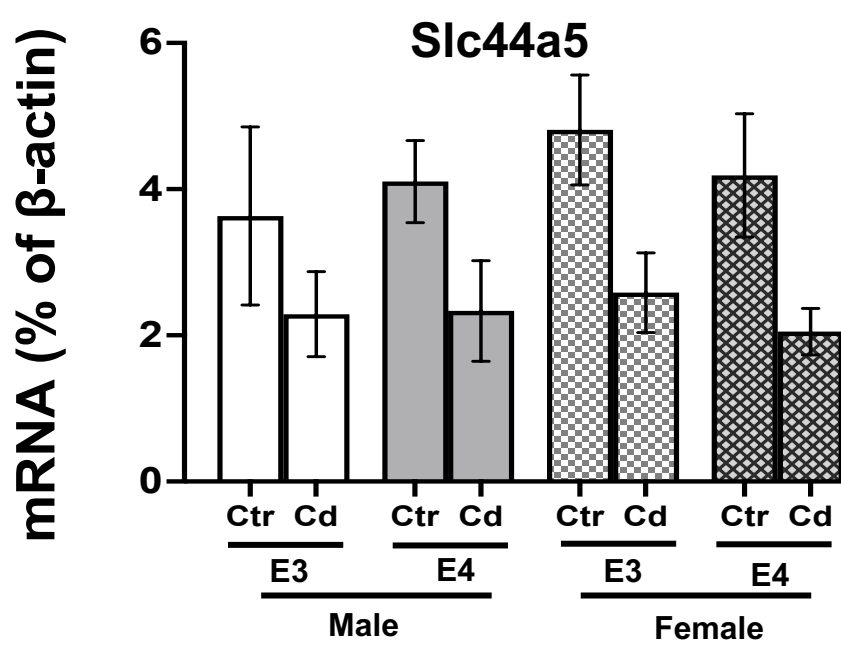

Fig.s4

Slc38a4

56 kD

GAPDH

36 kD

Ctrl Cd Ctrl Cd Ctrl Cd Ctrl Cd  
E3 E4 E3 E4  
Male Female

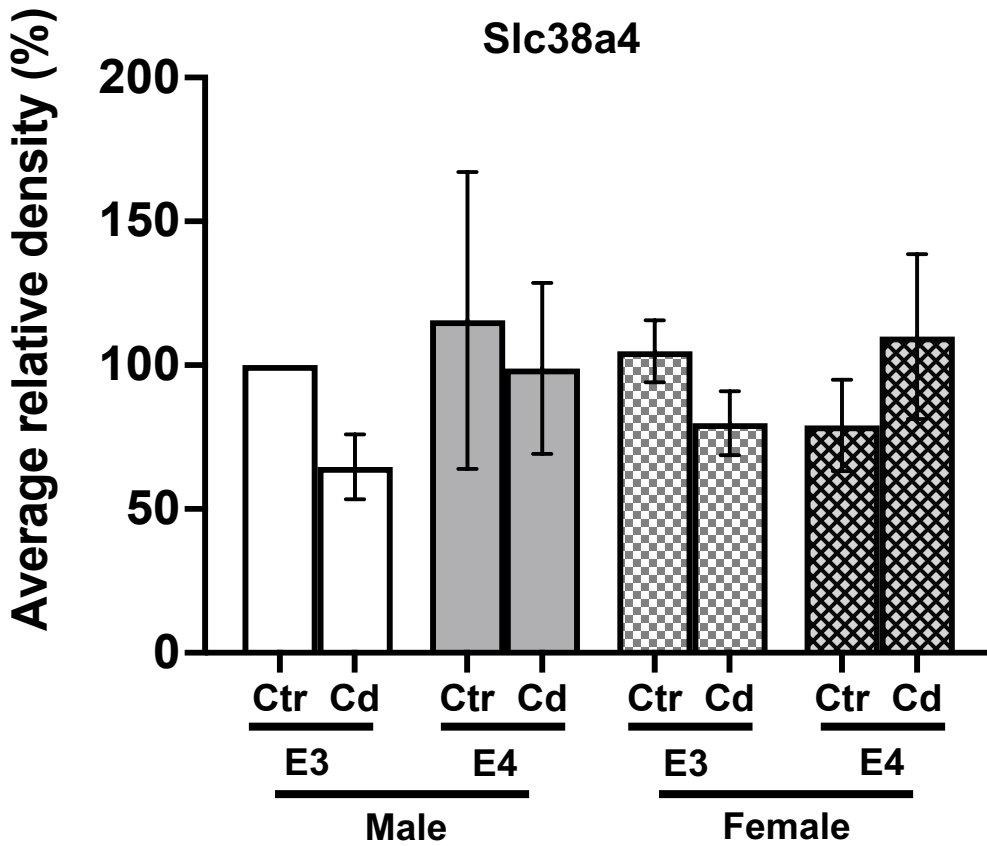

Fig.s5

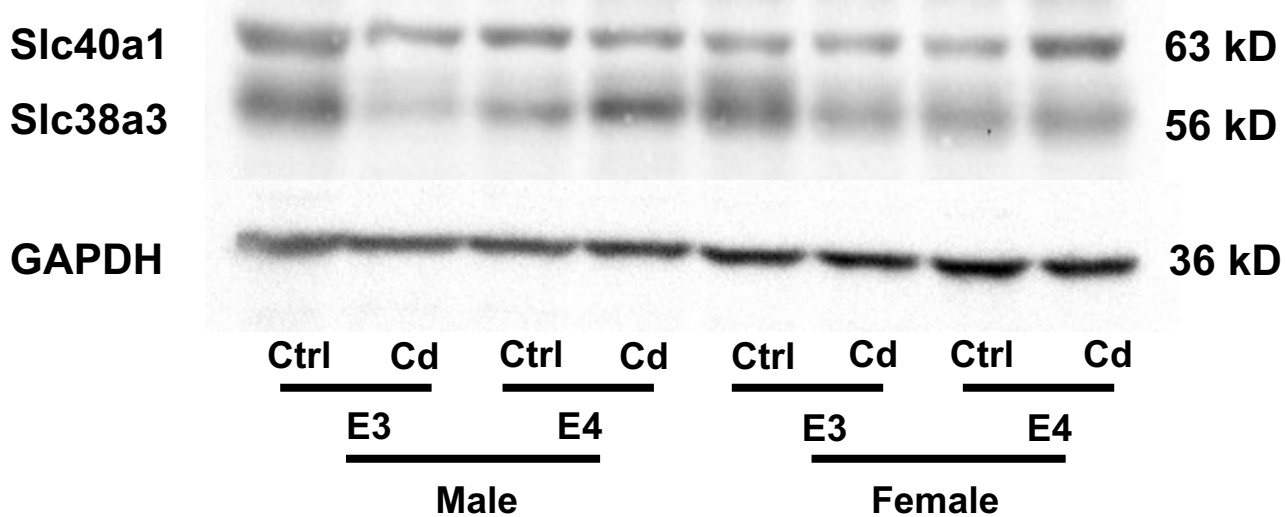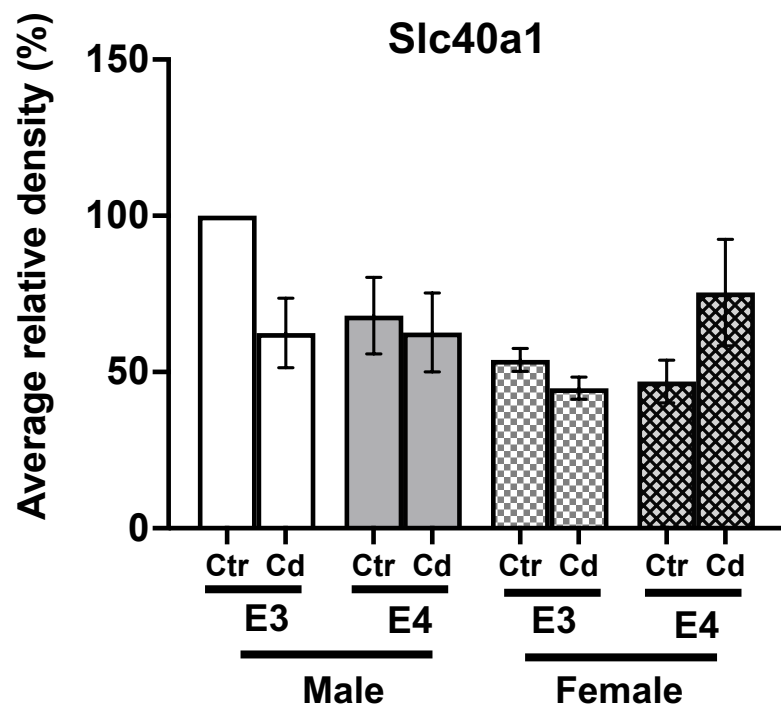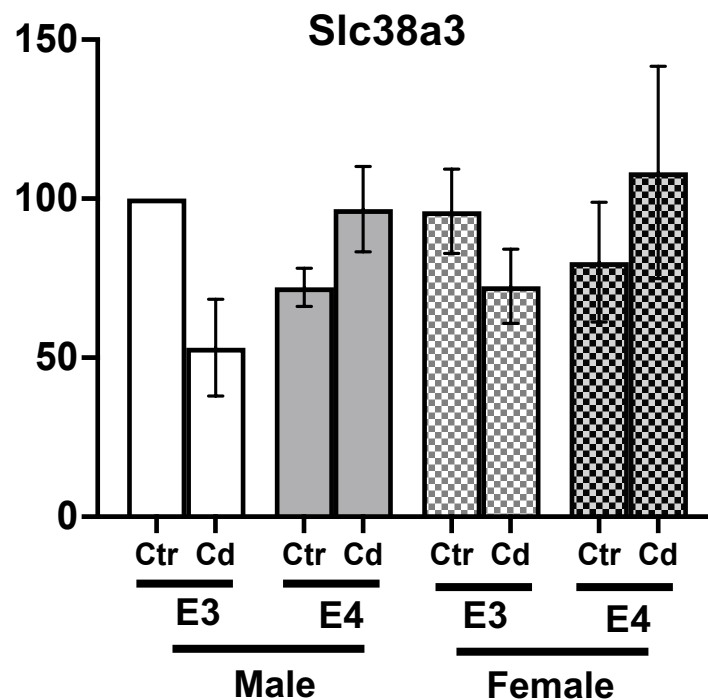

**Fig.s6**
